# Supplementary material
Source: PubMed Central journal article supplement (PMC4656859)
Supplement: mmc2.pdf [file mmc2.pdf]

## Article

Contributions of  $\text{Ca}^{2+}$ -Independent Thin Filament Activation to Cardiac Muscle FunctionYasser Aboelkassem,<sup>1</sup> Jordan A. Bonilla,<sup>2</sup> Kimberly J. McCabe,<sup>1</sup> and Stuart G. Campbell<sup>1,\*</sup><sup>1</sup>Department of Biomedical Engineering, Yale University, New Haven, Connecticut; and <sup>2</sup>Department of Computing and Mathematical Sciences, California Institute of Technology, Pasadena, California

**ABSTRACT** Although  $\text{Ca}^{2+}$  is the principal regulator of contraction in striated muscle, in vitro evidence suggests that some actin-myosin interaction is still possible even in its absence. Whether this  $\text{Ca}^{2+}$ -independent activation (CIA) occurs under physiological conditions remains unclear, as does its potential impact on the function of intact cardiac muscle. The purpose of this study was to investigate CIA using computational analysis. We added a structurally motivated representation of this phenomenon to an existing myofilament model, which allowed predictions of CIA-dependent muscle behavior. We found that a certain amount of CIA was essential for the model to reproduce reported effects of nonfunctional troponin C on myofilament force generation. Consequently, those data enabled estimation of  $\Delta G_{\text{CIA}}$ , the energy barrier for activating a thin filament regulatory unit in the absence of  $\text{Ca}^{2+}$ . Using this estimate of  $\Delta G_{\text{CIA}}$  as a point of reference ( $\sim 7 \text{ kJ mol}^{-1}$ ), we examined its impact on various aspects of muscle function through additional simulations. CIA decreased the Hill coefficient of steady-state force while increasing myofilament  $\text{Ca}^{2+}$  sensitivity. At the same time, CIA had minimal effect on the rate of force redevelopment after slack/restretch. Simulations of twitch tension show that the presence of CIA increases peak tension while profoundly delaying relaxation. We tested the model's ability to represent perturbations to the  $\text{Ca}^{2+}$  regulatory mechanism by analyzing twitch records measured in transgenic mice expressing a cardiac troponin I mutation (R145G). The effects of the mutation on twitch dynamics were fully reproduced by a single parameter change, namely lowering  $\Delta G_{\text{CIA}}$  by  $2.3 \text{ kJ mol}^{-1}$  relative to its wild-type value. Our analyses suggest that CIA is present in cardiac muscle under normal conditions and that its modulation by gene mutations or other factors can alter both systolic and diastolic function.

## INTRODUCTION

Ventricular relaxation occurs as intracellular  $\text{Ca}^{2+}$  drops to resting levels. Under low  $\text{Ca}^{2+}$  conditions, contraction is inhibited by the troponin/tropomyosin complex (see Gordon et al. (1) for review). However, experimental evidence has long suggested that some degree of actin-myosin interaction is possible even in the absence of  $\text{Ca}^{2+}$  (2–5). Under  $\text{Ca}^{2+}$ -free conditions, as many as 5% of actin binding sites are occupied by myosin, according to some estimates made from solution studies of purified myofilament components (3,4).

Despite abundant in vitro evidence for  $\text{Ca}^{2+}$ -independent activation (CIA), its relevance to in vivo cardiac function is not clear. Striated muscle preparations can produce small amounts of actin-myosin-based force under low  $\text{Ca}^{2+}$  conditions, especially near physiological temperatures (6,7). This suggests that residual actin-myosin crossbridges resist diastolic filling, adding to the resistance provided by other structures such as collagen and titin (8). However, distinguishing the contributions of these various factors is techni-

cally challenging, and cross bridge-based diastolic stiffness remains controversial (9).

Beyond any impact during diastole, it seems possible that the same molecular mechanisms that underlie CIA could also impact behavior of the muscle when  $\text{Ca}^{2+}$  is present. Lehrer and Geeves (10) recently proposed myosin-induced dissociation of troponin I (TnI) from the surface of actin as one such mechanism. This notion was embodied in a new structural state they call  $\text{M}^-$ , a state in which myosin is bound to actin even though the associated troponin complex lacks  $\text{Ca}^{2+}$ . They observed that adding the  $\text{M}^-$  state into their model predicted not only an increase in myosin S1 binding at low  $\text{Ca}^{2+}$ , but also an increase in  $\text{Ca}^{2+}$  sensitivity and a reduction in the Hill coefficient of the activity-pCa relationship. By their own interpretation, permitting the  $\text{M}^-$  state perturbs thin filament equilibrium in favor of activation, thereby enhancing activity at all submaximal  $\text{Ca}^{2+}$  levels.

We have furthered the analysis of Lehrer and Geeves (10) by comparing our own model of CIA against mechanical measurements made in functioning cardiac preparations. In the process, we have been able to use specific data sets to constrain the extent of CIA in a more physiologically relevant context. That enabled a systematic study of its contribution not only to steady-state levels of activation,

Submitted May 1, 2015, and accepted for publication September 11, 2015.

\*Correspondence: [stuart.campbell@yale.edu](mailto:stuart.campbell@yale.edu)

Yasser Aboelkassem's current address is Institute for Computational Medicine, Johns Hopkins University, Baltimore, Maryland.

Editor: David Warshaw.

© 2015 by the Biophysical Society  
0006-3495/15/11/2101/12

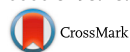

but also dynamic phenomena such as the rate of force redevelopment ( $k_{tr}$ ), the rate of tension development following  $\text{Ca}^{2+}$  activation ( $k_{act}$ ), and twitch contraction events. Our analyses provide evidence that CIA has wide-ranging effects on the behavior of cardiac muscle, and that it can be used as the basis for describing the effects of certain cardiomyopathy-associated mutations on twitch kinetics.

## MATERIALS AND METHODS

### Background for model development

To explore consequences of CIA on myofilament behavior, we added a new  $\text{Ca}^{2+}$ -independent activation pathway to our previous model of thin filament regulation and myosin binding (11). In the earlier model, we had assumed that transition of tropomyosin (Tm) out of the blocked position was impossible without having  $\text{Ca}^{2+}$  bound to troponin C (TnC). This has been referred to as the tight coupling premise (12). Here, we considered the possibility of loose coupling (13), wherein Tm can occasionally move from a blocked to closed state even in the absence of  $\text{Ca}^{2+}$ . Justification for assuming some degree of loose coupling comes from considering the function of TnI as presently understood (see Kobayashi and Solaro (14) for review). Under conditions of low  $\text{Ca}^{2+}$ , the inhibitory region (IR) of TnI is bound to the surface of actin, thereby pinning Tm in the blocked state. Tm is able to leave the blocked state only after the IR dissociates from actin, which is facilitated by the binding of the switch region (SR) of TnI to the N-terminal lobe of TnC. When  $\text{Ca}^{2+}$  is bound to site II on TnC, this enhances the affinity of the SR for TnC, thereby causing activa-

tion to be  $\text{Ca}^{2+}$ -sensitive. With this in mind, CIA could reasonably occur as a consequence of either spontaneous IR dissociation from actin or spontaneous binding of the SR to  $\text{Ca}^{2+}$ -free TnC. We have lumped these two putative phenomena into a single  $\text{Ca}^{2+}$ -independent activation pathway in the model presented here.

This model follows the formulation of discrete myofilament structural states as described previously by Campbell et al. (11), as shown in Fig. 1. The actin thin filament is discretized into a linear series of  $N = 26$  regulatory units (RUs), each composed of 7-actin monomers, 1 Tm molecule, and 1 troponin (Tn) complex. For simplicity, each RU is assumed to contain a single myosin S1 binding site. The behavior of each RU is described by a three-state model corresponding to the known structural positions of Tm on the actin surface—namely, the blocked position  $B$  (myosin binding sites on actin are sterically blocked by Tm), closed position  $C$  (only weak binding of S1 to actin is permissible), and the open position  $M$  (corresponding to the presence of strongly bound S1) (3,15).  $\text{Ca}^{2+}$ -dependent control of the  $B \leftrightarrow C$  transition is represented by partitioning  $B$  into  $\text{Ca}^{2+}$ -free and  $\text{Ca}^{2+}$ -bound states ( $B_0$  and  $B_1$ , respectively). The representation of structural overlap of Tm molecules between nearest-neighbor RUs is retained from the original model formulation (11).

An additional two structural RU states are needed to represent CIA caused by spontaneous TnI activity. These states are labeled  $C_0$  and  $M_0$ , with the subscript 0 denoting the absence of  $\text{Ca}^{2+}$  bound to TnC. Similarly, we have added a subscript 1 to the former  $C$  and  $M$  states to explicitly indicate the presence of  $\text{Ca}^{2+}$ . The final kinetic diagram showing these new states, along with the associated kinetic rates, is shown schematically in Fig. 1 C. Within each RU, transitions between the six states are governed by their differences in free energy as well as the states occupied by their nearest-neighbor RUs. Kinetic rates for the model are derived from these free energy terms as explained in the next section.

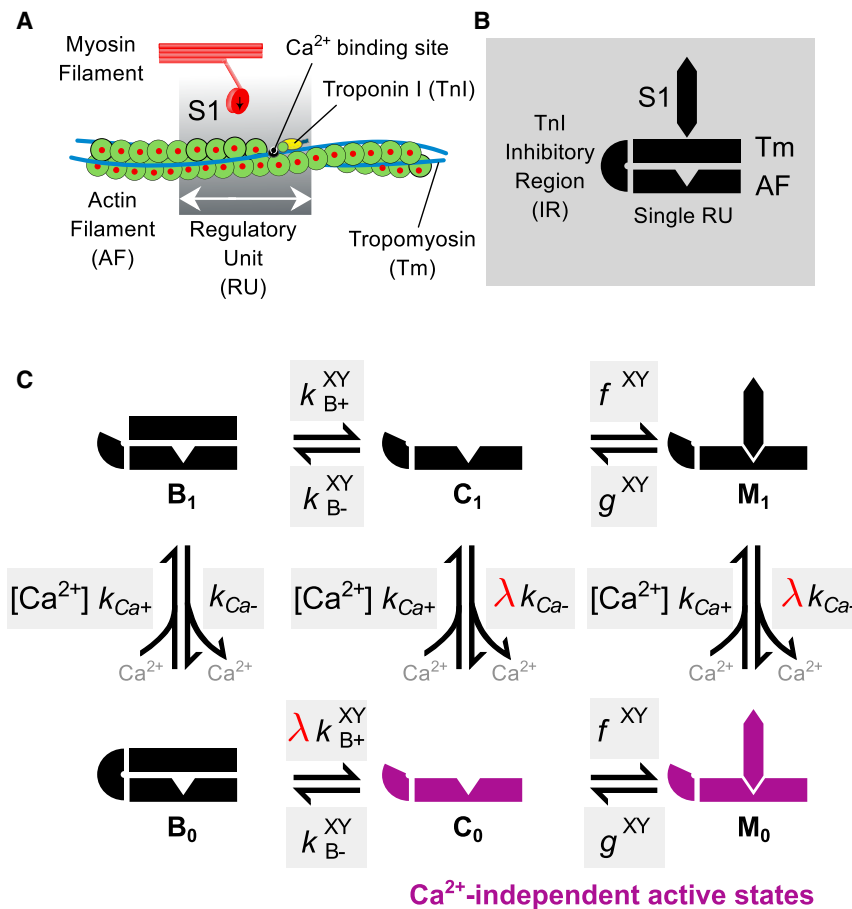

**FIGURE 1** Schematic diagram of model components and states. (A) The model represents the function of individual thin filament regulatory units (RUs), as well as their interactions with myosin S1 and nearest neighbor RUs along the thin filament. (B) Illustration of symbols used to represent key myofilament components, including a single RU, the TnI inhibitory region (IR), tropomyosin (Tm), and myosin S1. (C) State diagram showing the assumed six possible regulatory states for an individual RU. (Shaded boxes) Kinetic rates for each state transition. From the  $B_0$  state, activation can proceed through  $\text{Ca}^{2+}$  binding, which causes the IR to dissociate from actin, or through spontaneous transfer of TnI from actin to TnC (see main text for details). The degree of  $\text{Ca}^{2+}$ -independent activation is controlled by the parameter  $\lambda$  (red). When  $\lambda > 0$ , the  $\text{Ca}^{2+}$ -independent activated states  $C_0$  and  $M_0$  (purple) can be occupied. Superscripts  $X$  and  $Y$  on some rates indicate that they are subject to these states occupied by neighboring RUs along the thin filament. To see this figure in color, go online.

## Simultaneous representation of loose coupling and nearest-neighbor interactions

Identical to our previous analysis (11), we assume some free energy difference  $\Delta G_{B \leftrightarrow C}^{\text{ref}}$  between  $B$  and  $C$  states that arises from interactions between Tm and the surface of the actin filament. This energy difference assumes reference conditions in which both neighboring RUs occupy the  $C$  state. Using the Gibbs relation, we obtain a reference equilibrium constant between  $B$  and  $C$  states:

$$K_B^{\text{ref}} = \exp \frac{-\Delta G_{B \leftrightarrow C}^{\text{ref}}}{RT}. \quad (1)$$

We can add to this description of the  $B \leftrightarrow C$  equilibrium by considering other factors that contribute to the free energy landscape. Interactions of each RU with its nearest neighbors (via Tm-Tm overlap) are assumed to add additional energy terms that influence this equilibrium. For instance, an RU transitioning into the  $C$  state while its neighbor remains in the  $B$  state will have to induce a significant amount of local bending at their shared Tm-Tm junction. Hence, a neighbor-dependent description of the  $B \leftrightarrow C$  energy difference can be written as follows:

$$\Delta G_{B \leftrightarrow C}^{XY} = \Delta G_{B \leftrightarrow C}^{\text{ref}} + \Delta G_{B \leftrightarrow C}^X + \Delta G_{B \leftrightarrow C}^Y. \quad (2)$$

The terms  $\Delta G_{B \leftrightarrow C}^X$  and  $\Delta G_{B \leftrightarrow C}^Y$  represent the energy differences induced by Tm-Tm interactions with left and right neighboring RUs, respectively. The superscripts  $X$  and  $Y$  correspond to this Tm status ( $B$ ,  $C$ , or  $M$ ) of left and right RU neighbors. Applying the Gibbs relation separately to  $\Delta G_{B \leftrightarrow C}^{\text{ref}}$  and  $(\Delta G_{B \leftrightarrow C}^X + \Delta G_{B \leftrightarrow C}^Y)$  terms in Eq. 2, we can now describe the neighbor-dependent  $B \leftrightarrow C$  equilibrium constant as the product of a reference equilibrium constant and a cooperative coefficient  $\gamma(XY)$ :

$$K_B^{XY} = \gamma(XY)K_B^{\text{ref}}. \quad (3)$$

Equation 3 suffices for the description of the equilibrium between Ca<sup>2+</sup>-bound states  $B_1$  and  $C_1$ . However, the free energy difference between the Ca<sup>2+</sup>-free states  $B_0$  and  $C_0$  requires another term to account for the additional energy required for IR dissociation from actin or SR binding to TnC in the absence of Ca<sup>2+</sup>:

$$\Delta G_{B_0 \leftrightarrow C_0}^{XY} = \Delta G_{B \leftrightarrow C}^{XY} + \Delta G_{\text{CIA}}. \quad (4)$$

$\Delta G_{\text{CIA}}$  is a generic energy term in the sense that it does not distinguish between IR and SR activity but instead represents in a lumped sense the properties of Ca<sup>2+</sup>-independent RU activation in the myofilament system. Similar to  $\gamma(XY)$ ,  $\Delta G_{\text{CIA}}$  can be transformed into a coefficient affecting the  $B \leftrightarrow C$  equilibrium constant via the Gibbs relation:

$$\lambda = \exp \frac{-\Delta G_{\text{CIA}}}{RT}. \quad (5)$$

Thus, the overall equilibrium constant relating states  $B_0$  and  $C_0$  is

$$K_{B_0}^{XY} = \lambda \gamma(XY)K_B^{\text{ref}} = \lambda K_B^{XY}. \quad (6)$$

The free energy between  $C_{(0,1)}$  and  $M_{(0,1)}$  states and the associated equilibrium constants can be derived using a similar procedure. This yields

$$K_M^{XY} = \mu(XY)K_M^{\text{ref}}, \quad (7)$$

where  $K_M^{\text{ref}}$  is the reference  $C \leftrightarrow M$  equilibrium constant and  $\mu(XY)$  is a cooperative coefficient analogous to  $\gamma(XY)$  representing the impact of neighboring RU states on the  $C \leftrightarrow M$  equilibrium.

For convenience, we define the contribution of a single  $B$  or  $M$  neighbor, respectively, on the  $B \leftrightarrow C$  equilibrium as the coefficients

$$\gamma_B = \left( \exp \frac{-\Delta G_{B \rightarrow C}^B}{RT} \right)^{-1}, \quad (8)$$

$$\gamma_M = \exp \frac{-\Delta G_{B \rightarrow C}^M}{RT}.$$

The free energy term  $\Delta G_{B \rightarrow C}^B$  is the energy imposed by a neighboring RU in the  $B$  state on a  $B \rightarrow C$  transition. Similarly,  $\Delta G_{B \rightarrow C}^M$  is the energy imposed by a neighboring RU in the  $M$  state on a  $B \rightarrow C$  transition. Using these coefficients, the overall cooperative coefficient  $\gamma(XY)$  for any combination of neighbor states is given by

$$\gamma(XY) = \gamma(YX) = \begin{cases} \gamma_B^{-2} & X, Y \in \{B_0, B_1\} \\ \gamma_B^{-1} & X \in \{B_0, B_1\}, Y \in \{C_0, C_1\} \\ \gamma_B^{-1} \gamma_M & X \in \{B_0, B_1\}, Y \in \{M_0, M_1\} \\ 1 & X, Y \in \{C_0, C_1\} \\ \gamma_M & X \in \{C_0, C_1\}, Y \in \{M_0, M_1\} \\ \gamma_M^2 & X \in \{M_0, M_1\}. \end{cases} \quad (9)$$

In like manner, the cooperative coefficient  $\mu(XY)$  is defined as

$$\mu(XY) = \mu(YX) = \begin{cases} \mu_B^{-2} & X, Y \in \{B_0, B_1\} \\ \mu_B^{-1} & X \in \{B_0, B_1\}, Y \in \{C_0, C_1\} \\ \mu_B^{-1} \mu_M & X \in \{B_0, B_1\}, Y \in \{M_0, M_1\} \\ 1 & X, Y \in \{C_0, C_1\} \\ \mu_M & X \in \{C_0, C_1\}, Y \in \{M_0, M_1\} \\ \mu_M^2 & X \in \{M_0, M_1\}. \end{cases} \quad (10)$$

By this formulation, whenever at least one of the cooperative coefficients ( $\gamma_B$ ,  $\gamma_M$ ,  $\mu_B$ , or  $\mu_M$ ) has a value greater than unity, each RU will be affected by the states occupied by its neighbors. These interactions in sufficient strength can cause the Hill coefficient of steady-state force ( $n_H$ ) to be much greater than 1. As in the previous formulation, microscopic reversibility constrains  $\gamma_M$  and  $\mu_B$  to be equal in value (11).

Up to this point, the model equations have been derived from free energy differences between thin filament states, which allow a thermodynamically consistent and unambiguous formulation of cooperative coefficients and equilibrium constants. While the cooperative coefficients are retained as free parameters in the model, equilibrium constants are generally not, due to practical considerations. Because we wish to conduct not only equilibrium but also dynamic simulations, equilibrium constants are insufficient on their own and it is necessary to specify either a pair of kinetic rates (forward and reverse) or one of the rates together with the equilibrium constant. Kinetic rates for Tm transitions relate to the reference equilibrium coefficients as follows:

$$K_B^{\text{ref}} = \frac{k_{B+}^{\text{ref}}}{k_{B-}^{\text{ref}}} \quad (11)$$

$$K_M^{\text{ref}} = \frac{f^{\text{ref}}}{g^{\text{ref}}}. \quad (12)$$

Here,  $k_{B+}^{\text{ref}}$  is the reference rate of transition  $B \rightarrow C$ , and  $k_{B-}^{\text{ref}}$  is the reference rate for  $C \rightarrow B$ . We assume  $C \leftrightarrow M$  transitions to be driven by the cycling of cross bridges, hence the kinetic rates  $f^{\text{ref}}$  and  $g^{\text{ref}}$  assume the familiar

identities of the rates of cross-bridge attachment and detachment, respectively.

To determine the final kinetic rates for Tm transitions, the nearest-neighbor cooperative coefficients must be partitioned between forward and reverse directions. This we accomplish with the scaling parameters  $r$  and  $q$ . It can be shown that final kinetic parameters of the following form satisfy Eqs. 3 and 7:

$$k_{B_0+}^{XY} = k_{B_0+}^{\text{ref}} \gamma (XY)^q \quad (13)$$

$$k_{B_0-}^{XY} = k_{B_0-}^{\text{ref}} \gamma (XY)^{(q-1)} \quad (14)$$

$$f^{XY} = f^{\text{ref}} \mu (XY)^r \quad (15)$$

$$g^{XY} = g^{\text{ref}} \mu (XY)^{(r-1)}. \quad (16)$$

Equations 15 and 16 apply identically to the  $C_1 \leftrightarrow M_1$  and  $C_0 \leftrightarrow M_0$  transitions, ignoring the  $\text{Ca}^{2+}$  binding status of the RU. Likewise, the reverse transitions  $C_1 \rightarrow B_1$  and  $C_0 \rightarrow B_0$  are assumed to be  $\text{Ca}^{2+}$ -independent, both following Eq. 14. However, the rate shown in Eq. 13 applies only to the  $\text{Ca}^{2+}$ -bound case of  $B_1 \rightarrow C_1$ . Recalling Eq. 6, the final transition rate for  $B_0 \rightarrow C_0$  (assuming that the energy barrier  $\Delta G_{\text{CIA}}$  applies to the forward rate only) must be

$$k_{B_0+}^{XY} = \lambda k_{B_0+}^{\text{ref}} \gamma (XY)^q. \quad (17)$$

One nonobvious consequence of invoking loose coupling in this manner is that, to satisfy microscopic reversibility,  $\lambda$  must appear in one of the other kinetic rates around the loop of states ( $B_0 - B_1 - C_1 - C_0 - B_0$ ). (The product of rate constants clockwise around a loop must equal the product of rate constants around the counterclockwise direction.) It has been demonstrated that the rate of  $\text{Ca}^{2+}$  dissociation from TnC is greatly reduced by thin filament activation (16). Accordingly, we scale the  $\text{Ca}^{2+}$  dissociation rate by  $\lambda$  for the case where  $\text{Ca}^{2+}$  dissociates from an RU in the  $C_1$  state. Because  $\lambda$  takes on values of  $0 < \lambda < 1$ , this has the effect of increasing the  $\text{Ca}^{2+}$  affinity of the troponin complex under conditions of activation (in accordance with experiments), while also ensuring that microscopic reversibility is preserved. A similar construction has been used by Rice et al. (17). Assuming that TnC- $\text{Ca}^{2+}$  affinity is similar in closed and open states, the dissociation rate of  $\text{Ca}^{2+}$  from  $M_1$  is also scaled by  $\lambda$ . Note that this is also necessary to satisfy microscopic reversibility in the scheme's other loop ( $C_0 - C_1 - M_1 - M_0 - C_0$ ). Hence, the rate of  $\text{Ca}^{2+}$  binding to an RU is governed by the second-order rate constant  $k_{\text{Ca}^+}$  irrespective of Tm position, but the dissociation rate is  $k_{\text{Ca}^-}$  for  $B_1 \rightarrow B_0$ , and  $\lambda k_{\text{Ca}^-}$  for  $C_1 \rightarrow C_0$  and  $M_1 \rightarrow M_0$  (Fig. 1 C).

## Markov chain-Monte Carlo simulations

We employed a standard Markov chain-Monte Carlo (MCMC) algorithm to simulate activation of a full-length cardiac thin filament composed of  $N$  coupled RUs ( $N = 26$ ). Each RU behaves according to the scheme described above and depicted in Fig. 1 C. The initial state of the system at time  $t = 0$  was always specified by placing all 26 RUs in the  $B_0$  state. To advance the system in time, repeated steps of  $\Delta t$  were taken. At each time step, the state of every individual RU in the filament was updated in turn by comparing a randomly drawn number  $R \in (0,1)$  with a set of transition probabilities  $P_{k_1}, P_{k_2}, \dots, P_{k_n}$  that correspond to the RU's state. Transition probabilities are computed by  $P_{k_l} = k_l \Delta t$ , where  $k_l$  represents the  $l$ th transition rate among  $n$  total transitions leading away from the state in question.

For example, consider an RU occupying the  $B_0$  state. In total, there are  $n = 2$  transitions leading away from this state ( $B_0 \rightarrow B_1$ ,  $B_0 \rightarrow C_0$ ; see Fig. 1), with corresponding transition probabilities  $P_1 = [\text{Ca}^{2+}] k_{\text{Ca}^+} \Delta t$

and  $P_2 = \lambda k_{B_0-}^{XY} \Delta t$ . The MCMC algorithm determines the new state of the RU ( $Z_{t+\Delta t}$ ) according to the following rules:

$$Z_{t+\Delta t} = \begin{cases} B_1 & 0 \leq R < P_1 \\ C_0 & P_1 \leq R < (P_1 + P_2) \\ B_0 & (P_1 + P_2) \leq R \leq 1. \end{cases} \quad (18)$$

This construction partitions the interval of  $R$  into three regions that correspond to  $B_0 \rightarrow B_1$ ,  $B_0 \rightarrow C_0$ , or no change (the RU remains in  $B_0$ ). Updates for RUs in the  $B_1$ ,  $M_1$ , and  $M_0$  states, which also have  $n = 2$  transitions, are analogous. For the states  $C_0$  and  $C_1$ , each of which have  $n = 3$  possible transitions, updates are similar to Eq. 18 except that the  $(0,1)$  interval of  $R$  is subdivided into four regions rather than three. Before each simulation, the full set of model parameters was analyzed automatically to determine an overall value for  $\Delta t$ , such that

$$\sum_{l=1}^n k_l \Delta t \leq 0.7 \quad (19)$$

for each of the six possible RU states. In other words,  $\Delta t$  was chosen such that no state had a cumulative transition probability for a single time step that exceeded 70%. Values for  $\Delta t$  ranged from 0.64 to 70  $\mu\text{s}$  in the simulations reported here.

Because many of the kinetic rates depend upon these states of an RU's nearest neighbors (Eqs. 13–16), the corresponding transition probabilities were updated for each RU at the beginning of every time step. RUs on either extreme of the thin filament were assigned to the  $B_0$  state and not permitted to transition during simulation, thereby acting as boundary conditions for the domain of the filament.

The state  $Z_{i,t}$  occupied by the  $i$ th RU in the simulated thin filament was recorded at every time point  $t$  for postprocessing. Force was calculated at each time point by counting up  $M_{\{0,1\}}$  states along the entire filament span:

$$F_t = \sum_{i=1}^N F_i, F_i = \begin{cases} 1 & Z_{i,t} \in \{M_0, M_1\} \\ 0 & Z_{i,t} \in \{B_0, B_1, C_0, C_1\}. \end{cases} \quad (20)$$

To obtain meaningful results from these stochastic simulations, each time series was repeated  $J$  times. The final average force  $\bar{F}_t$  at any given time step  $t$  is given by

$$\bar{F}_t = \frac{1}{J} \sum_{j=1}^J F_{j,t}, \quad (21)$$

where  $F_{j,t}$  is the force produced at  $t$  (Eq. 20) for the  $j$ th repetition.  $J = 1024$  repetitions were performed for all simulations reported herein.

The computational demand of these MCMC simulations was offset by implementing the model in CUDA C++ to take advantage of parallelism offered by graphics processing units (GPUs). Simulations were run on a Tesla K40 GPU (NVIDIA, Santa Clara, CA), with scripting and data post-processing performed using MATLAB (The MathWorks, Natick, MA). A single averaged force response like those shown in Fig. 2 required 1.5 s of wall clock time for typical parameter sets, the equivalent of 525,000 thin filament state updates per second. This was an  $\sim 30,000\times$  speedup over a naive MATLAB implementation of the model run on a 6-core Intel i7 processor (Santa Clara, CA).

## Simulation protocols

Model parameters and conditions were adjusted to mimic various experimental scenarios. In a typical simulation (Fig. 2),  $\text{Ca}^{2+}$  concentration was set at a constant value, and force output of the system was computed for 3000 ms. For all parameter sets used, this was sufficient time for the system



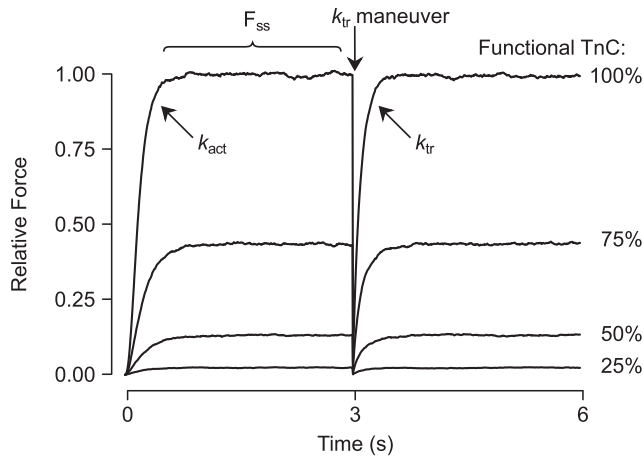

FIGURE 2 Model output for typical simulations. The model predicts contractile force produced by the myofilaments during sudden exposure to Ca<sup>2+</sup>. pCa was set to 4 in these records at time zero. After a period of rapid change (described by the rate constant  $k_{act}$ ), force reached a steady-state level ( $F_{SS}$ ). A slack/restretch maneuver was then mimicked by instantaneously removing all attached cross bridges and observing the rate of force redevelopment ( $k_{tr}$ ). Simulations were also performed in which Ca<sup>2+</sup> binding to some fraction of randomly selected RUs was eliminated, imitating experiments in which nonfunctional troponin C (TnC) was incorporated into myofilaments (19,20). Initial simulations with the tightly coupled model (i.e.,  $\lambda = 0$ ) are shown here under conditions of 100, 75, 50, and 25% functional TnC. Force is shown relative to  $F_{SS}$  of the 100% functional TnC curve.

to reach steady state. After 3 s are elapsed, all RUs occupying  $M$  states were set to the corresponding  $C$  state ( $C_0$  or  $C_1$ ) to simulate a  $k_{tr}$  maneuver in which cross bridges are instantaneously broken. Force redevelopment was observed by continuing simulation for another 3000 ms postmaneuver. Values of  $k_{tr}$  were computed assuming an exponential rise in force after breaking of cross bridges (18).  $k_{act}$ , the rate of force development after Ca<sup>2+</sup> activation, was calculated in the same manner. We constructed steady-state force-pCa curves by repeating this simulation protocol at several Ca<sup>2+</sup> concentrations, and computing the force at steady state for each case.

We also simulated experiments where myofilaments are reconstituted with nonfunctional, non-Ca<sup>2+</sup> binding TnC (xTnC) (19,20). This was implemented by randomly designating RUs as normal or xTnC-containing before each repetition. xTnC-containing RUs had their kinetic models altered such that they remained permanently in the Ca<sup>2+</sup>-free states ( $B_0$ ,  $C_0$ , or  $M_0$ ). Varying proportions of xTnC were incorporated into simulations to study its effects on properties such as Ca<sup>2+</sup>-activated force and  $k_{tr}$ .

Finally, we simulated Ca<sup>2+</sup>-activated isometric twitches by causing Ca<sup>2+</sup> concentration to vary with time. A representative Ca<sup>2+</sup> transient, recorded in rat trabecula by Janssen and de Tombe (21) was digitized and used as Ca<sup>2+</sup> input for some twitch simulations. Representative transients were also digitized from Wen et al. (22) for model analysis of the Tnl R145G mutation.

TABLE 1 Model parameter values

| Set | $\lambda$ | $k_{Ca+}$ ( $\mu\text{M}^{-1}\text{ms}^{-1}$ ) | $k_{Ca-}$ ( $\text{ms}^{-1}$ ) | $k_{B+}^{\text{ref}}$ ( $\text{ms}^{-1}$ ) | $k_{B-}^{\text{ref}}$ ( $\text{ms}^{-1}$ ) | $f^{\text{ref}}$ ( $\text{ms}^{-1}$ ) | $g^{\text{ref}}$ ( $\text{ms}^{-1}$ ) | $\gamma_B$ | $\gamma_M$ | $\mu_M$ | $q$  | $r$  |
|-----|-----------|------------------------------------------------|--------------------------------|--------------------------------------------|--------------------------------------------|---------------------------------------|---------------------------------------|------------|------------|---------|------|------|
| 1   | 0.06      | 1.14                                           | 10.0                           | 17.0                                       | 0.084                                      | 0.0034                                | 0.007                                 | 96         | 1.1        | 1.0     | 1.0  | 1.0  |
| 2   | 0.06      | 5.02                                           | 3.81                           | 195                                        | 2.19                                       | 0.7                                   | 0.243                                 | 153        | 1.6        | 1.8     | 0.5  | 1.0  |
| 3   | 0.06      | 10.0                                           | 9.21                           | 82.3                                       | 2.25                                       | 1.0                                   | 0.610                                 | 61         | 2.0        | 1.91    | 0.97 | 0.33 |

The values optimized to fit data from skinned rat trabeculae at 25°C (set 1), intact rat trabeculae at 22°C (set 2), and intact mouse papillary muscle at room temperature (set 3).

Parameter optimization was used to generate baseline parameter sets corresponding to data from skinned rat trabeculae at 25°C (19), intact rat trabeculae at 22°C (21), and intact mouse papillary muscle at room temperature (22). These sets, shown in Table 1, were obtained using a particle swarm optimization algorithm (23). For set 1 (skinned rat trabeculae), optimization was performed to minimize the least-squares error between measured and modeled values of maximally activated force under different levels of xTnC, the baseline force-pCa relationship (0% xTnC), and the baseline  $k_{tr}$ -pCa relationship. Simultaneous fitting to all three curves constrained  $\lambda$  to its final estimated value of 0.06. Intact muscle parameter sets (sets 2 and 3) were obtained by fixing  $\lambda$  at 0.06 and adjusting other model parameters until the least-squares error between the measured and simulated twitch time courses was minimized. The parameter differences seen between sets are most likely due to the effects of muscle skinning (24) (between sets 1 and 2) and interspecies differences (rat in sets 1 and 2 versus mouse in set 3). Except where noted, the simulations reported here used parameter set 1.

## RESULTS

We first sought means of estimating the value of  $\lambda$ , the parameter representing the extent of Ca<sup>2+</sup>-independent regulatory unit activation (CIA). Our overall approach was to identify a data set that a tightly coupled model ( $\lambda = 0$ ) could not reproduce and then determine an approximate  $\lambda$ -value that reconciled the discrepancy. In previous work (11), we showed that the tightly coupled model exhibits some systematic deviations from measurements in which nonfunctional TnC (xTnC) is exchanged into skinned cardiac muscle preparations (19). Simulations overestimated the inhibitory effect of xTnC on maximal Ca<sup>2+</sup>-activated force (e.g., Fig. 3 A).

To confirm that the tightly coupled model was incapable of reproducing the reported  $F_{SS}$ -xTnC relationship, we systematically perturbed other key model parameters while holding  $\lambda$  equal to zero (Fig. 3). Simulations were repeated with wide-ranging values for the TnC Ca<sup>2+</sup> affinity ( $K_{Ca}$ ), the reference equilibrium constant between  $B$  and  $C$  states ( $K_{+B}^{\text{ref}}$ ), and the cooperative coefficient  $\gamma_B$ . In xTnC simulations, changing  $K_{Ca}$  had no effect upon the  $F_{SS}$ -xTnC relationship whatsoever (Fig. 3 A). Increasing  $K_{+B}^{\text{ref}}$  so that functional RUs favored the  $C$  rather than  $B$  state did increase the force at each intermediate level of % functional TnC, but even at extreme values the model produced no inflection point between 50 and 75% functional TnC as implied by the data (see *overlay data points* in Fig. 3 B). The model showed greatest sensitivity to variations in  $\gamma_B$ . In the extreme case ( $\gamma_B = 1$ ), no cooperative interactions exist between neighbors and a 1:1 relationship between %

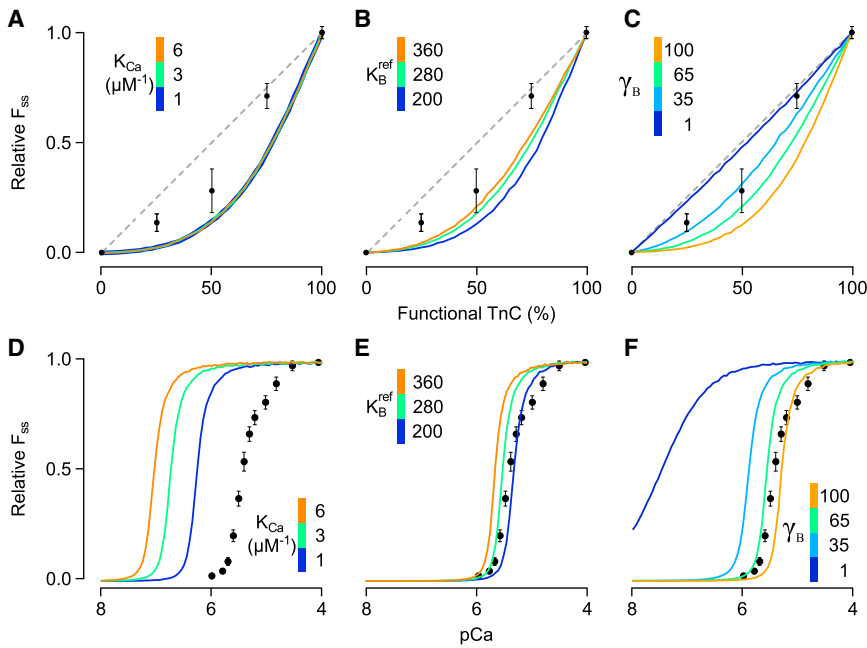

FIGURE 3 Sensitivity of the tightly coupled model to various parameter changes. The dependence of  $F_{SS}$  on % functional TnC (A–C) and on pCa (D–F) was studied in the tightly coupled model ( $\lambda = 0$ ) while perturbing other key model parameters. Perturbations included large changes in the  $\text{Ca}^{2+}$ -TnC equilibrium constant ( $K_{Ca}$ , A and D), the equilibrium constant governing the  $B \rightarrow C$  transition ( $K_B^{\text{ref}}$ , B and E), and the cooperative coefficient  $\gamma_B$  (C and F). Measured  $F_{SS}$ -functional TnC and  $F_{SS}$ -pCa relationships were digitized from Gillis et al. (19) and are shown here for comparison. (A–C, dashed line) Generic 1:1 relationship between  $F_{SS}$  and % functional TnC for reference. Under conditions of tight coupling, none of the parameter changes were capable of producing curves rising above the 1:1 line or having the characteristic inflection point implied by data from experiments. Changes that tended to improve agreement with the data in (A)–(C) shifted the corresponding curves away from measurements in (D)–(F). To see this figure in color, go online.

functional TnC and maximum force was produced (Fig. 3 C), a result also observed by Tanner et al. (25). Although adjustment to  $\gamma_B$  allowed the predicted xTnC-maximum force relationship to pass nearer to data points, it too lacked an inflection point. For each parameter set used in Fig. 3, A–C, we also simulated the corresponding  $F_{SS}$ -pCa relationship under conditions of 100% functional TnC (Fig. 3, D–F). Parameter changes that tended to improve the  $F_{SS}$ -xTnC relationship invariably increased  $\text{Ca}^{2+}$  sensitivity of  $F_{SS}$ , shifting curves far to the left of experimental measurements.

Having established that none of the original model parameters were capable of reconciling differences between simulated and measured effects of xTnC, we repeated xTnC simulations for values of  $\lambda > 0$ . Introducing CIA into the model in this way gives rise to an inflection point in the  $F_{SS}$ -xTnC curve (Fig. 4 A), in stark contrast to the other parameter changes studied (Fig. 3). Another unique effect of  $\lambda$  was its ability to allow curves to range above the 1:1 line. Furthermore, we found that it was possible to match  $F_{SS}$ -xTnC curves from both cardiac (19) and skeletal muscle (20) simply by adjusting the value of  $\lambda$  (Fig. 4 B).

The fact that  $\lambda$  conferred unique characteristics to xTnC simulations indicated that, in combination with other measurements, the xTnC dataset could be used to constrain the value of  $\lambda$  to within reasonable limits. Besides the  $F_{SS}$ -xTnC relationship, Gillis et al. (19) also reported the  $F_{SS}$ -pCa and  $k_{tr}$ -pCa relationships for skinned rat trabeculae. We performed a global model fit to these three datasets using particle swarm optimization, yielding parameter set 1 (Table 1). This consensus set represents parameter values that lead to the best overall simultaneous reproduction of the  $F_{SS}$ -xTnC relationship (Fig. 4 B) and  $F_{SS}$ - $k_{tr}$ -pCa rela-

tionships under conditions of 100% functional TnC (light blue curves; see Fig. 5). Within parameter set 1,  $\lambda$  is constrained in the sense that either increasing or decreasing its value causes the global fit to deteriorate. The converged value of  $\lambda$  (0.06) is equivalent to a free energy barrier to  $\text{Ca}^{2+}$ -independent RU activation ( $\Delta G_{\text{CIA}}$ ) of 7 kJ mol $^{-1}$  at 25°C (Eq. 5).

A certain degree of independent validation for parameter set 1, including the final value of  $\lambda$ , was obtained by predicting full  $F_{SS}$ -pCa and  $k_{tr}$ -pCa curves for intermediate levels of functional TnC (Fig. 5). As seen in experiments, the addition of xTnC shifted the modeled force-pCa curves rightward while diminishing maximal force. The model also reproduced in qualitative fashion the dynamic effects of xTnC, as seen through measurements of the rate of force redevelopment ( $k_{tr}$ , Fig. 5 B). In experiments, conditions of 50% functional TnC were seen to greatly slow  $k_{tr}$  at submaximal pCa levels, shifting the entire curve rightward. Model predictions of  $k_{tr}$  for 50% functional TnC capture this dynamic effect as well (Fig. 5 B, orange curve). In the model, this behavior arises because RUs containing xTnC are only recruited after myosin binding takes place in neighboring RUs—a process that takes time and hence slows force redevelopment (26). This slowing effect is less apparent at high  $\text{Ca}^{2+}$  concentrations, where  $\text{Ca}^{2+}$ , and not recruitment, is the primary source of activation.

These results support the idea that CIA is not merely an in vitro phenomenon, but present to some degree in functioning muscle fibers as well. Simulations with the optimized parameter set predict that at the half-activation mark (pCa 5.4), roughly 5% of all RUs reside in one of the  $\text{Ca}^{2+}$ -free active states ( $C_0$  or  $M_0$ ). They also suggest

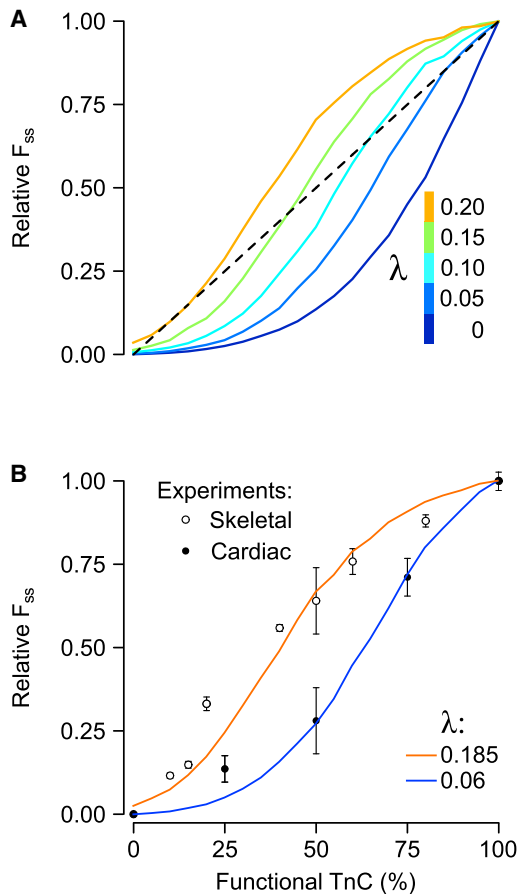

FIGURE 4 The effect of Ca<sup>2+</sup>-independent activation ( $\lambda$ ) on the  $F_{SS}$ -xTnC relationship. (A)  $F_{SS}$ -xTnC curves were computed for values of  $\lambda$  ranging between 0 and 0.2. (B)  $\lambda$ -values of 0.06 and 0.185 most closely reproduced experimental data reported in cardiac (19) and skeletal muscle preparations (20), respectively. To see this figure in color, go online.

that ~12% of force at half-activation comes from RUs that do not contain bound Ca<sup>2+</sup> (Fig. S1 in the Supporting Material). Having established a reasonable estimate of the magnitude of CIA ( $\lambda = 0.06$ ), we performed additional simulations to explore the different ways in which CIA might manifest itself in cardiac muscle behavior.

Using parameter set 1 as a baseline, we examined the effects of CIA on the  $F_{SS}$ -pCa relationship by varying  $\lambda$ -values between 0 and 0.2 (Fig. 6). Increasing CIA (increasing  $\lambda$ ) shifted the  $F_{SS}$ -pCa curve leftward, increasing Ca<sup>2+</sup> sensitivity (Fig. 6 A). At the same time, the Hill coefficient ( $n_H$ ) decreased linearly with increasing  $\lambda$  (Fig. 6 B), demonstrating that thin filament cooperativity and CIA are inversely coupled. Not surprisingly, another effect of enhanced CIA was increased force at low Ca<sup>2+</sup> (Fig. 6 C), indicating an inability of the myofilaments to completely inhibit contraction as  $\lambda$  is increased. Besides  $F_{SS}$ , rates of force generation ( $k_{act}$  and  $k_{tr}$ ) as functions of pCa and  $\lambda$  were also extracted from simulation records (see Fig. S2). The  $k_{tr}$  was minimally effected by the degree of CIA, only shifting in Ca<sup>2+</sup> sensitivity in a manner similar to the

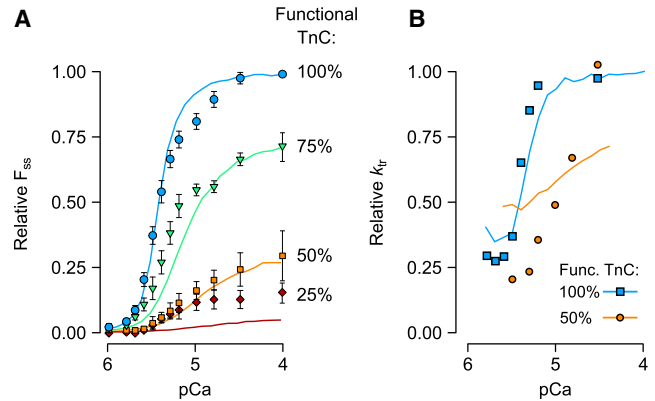

FIGURE 5 Predicted effects of xTnC on  $F_{SS}$ -pCa relationships (A) and  $k_{tr}$ -pCa relationships (B). The 100% functional TnC curves (light blue in A and B) were obtained by fitting the model simultaneously to the experimentally reported values from Gillis et al. (19) for both relationships, along with the  $F_{SS}$ -xTnC relationship reported in that same study (Fig. 4 B). Fitted values are listed under set 1 in Table 1. Predictions of  $F_{SS}$  and  $k_{tr}$  (solid lines) in the presence of xTnC were produced using set 1, but with increasing levels of simulated xTnC. (Symbols) Data digitized from the study of Gillis et al. (19). To see this figure in color, go online.

$F_{SS}$ -pCa relationship. On the other hand,  $k_{act}$  exhibited complex, nonlinear changes in response to perturbations of  $\lambda$  (Fig. S2, C and D).

To examine the effects of CIA in a more physiological context, we also simulated isometric twitches while varying the parameter  $\lambda$ . We began by first fitting model parameters to an isometric twitch measured in a sarcomere length-clamped rat trabecular preparation (21), resulting in parameter set 2 (Table 1). The intracellular Ca<sup>2+</sup> transient measured in that study was used to drive activation of the model (Fig. 7 A). The twitch tension produced as a result of parameter fitting showed excellent agreement with the measured response (Fig. 7 A). Next, we repeated the twitch simulation at several different levels of CIA,

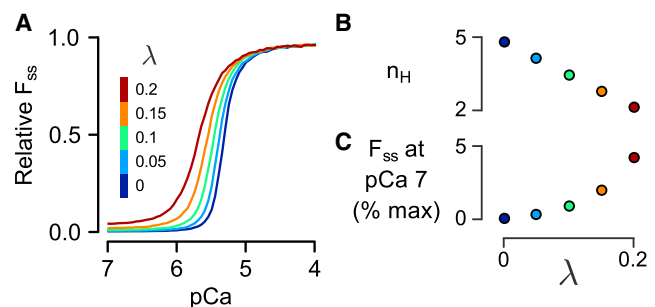

FIGURE 6 Effects of the parameter  $\lambda$  on the steady-state force ( $F_{SS}$ ). (A)  $F_{SS}$  as a function of pCa is shown for several different values of  $\lambda$ . (Dark blue line) Tight coupling case ( $\lambda = 0$ ). Increasing degrees of loose coupling or Ca<sup>2+</sup>-independent activation ( $\lambda > 0$ ) are shown by other colors, as labeled. (B) Increased  $\lambda$  reduces the Hill coefficient ( $n_H$ ) of the  $F_{SS}$ -pCa curves in a linear fashion. (C) Increasing  $\lambda$  increases the relative force produced by the model under low Ca<sup>2+</sup> conditions (pCa 7). To see this figure in color, go online.

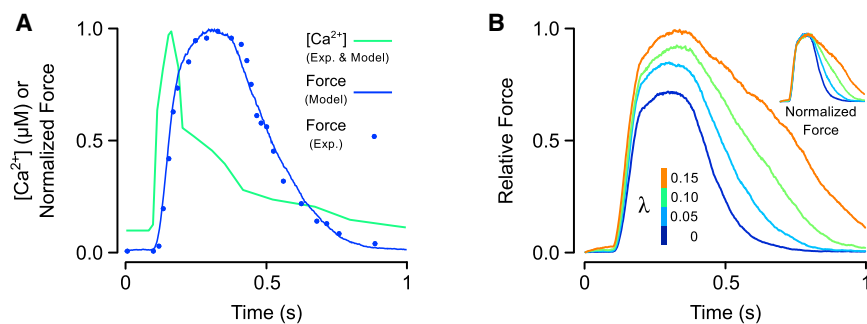

FIGURE 7 Simulations of cardiac twitch events. (A) A  $\text{Ca}^{2+}$  transient was digitized from a study of rat cardiac trabeculae (21) and used as an input to the model (green trace). The predicted twitch force was compared against a measured twitch response from the same study. Model parameters were adjusted to minimize error between the measured and simulated twitches (Table 1, set 2). (B) The effect of  $\text{Ca}^{2+}$ -independent activation on twitch force was examined by simulating twitches while varying  $\lambda$  between 0 and 0.15. The  $\text{Ca}^{2+}$  transient shown in (A) was used to elicit each contraction.

tion. Twitch magnitude has been scaled to the peak twitch force for  $\lambda = 0.15$ , at which 70% of RUs contained attached cross bridges. (Inset, B) Overlay of twitches after each has been normalized to its own peak. To see this figure in color, go online.

ranging from none ( $\lambda = 0$ ) to  $\lambda = 0.15$  (Fig. 7 B). Over this range, the time required to reach peak contraction changed by only 10%. At the same time, peak tension increased by 40% and the relaxation time (time from peak contraction to 50% relaxation), increased by 172%. These results suggest that CIA could be a potent modulator of relaxation in particular.

Having observed a meaningful impact of CIA on twitch kinetics, we considered conditions under which this muscle property might be perturbed. Among the possible sources of CIA as represented in our model is the relative affinity of the TnI IR for actin. We therefore used the model to analyze data obtained from intact papillary muscles of mice expressing a mutant R145G TnI transgene (22). This mutation results in the loss of a positively charged central residue within the IR domain on TnI, and could conceivably disrupt normal electrostatic interactions that promote inhibitory region-actin (IR-actin) binding. To determine whether the new model parameter  $\lambda$  could capture the phenotypic consequences of the R145G mutation, we undertook the following procedure: to start, isometric twitches were simulated in response to a measured wild-type (WT) mouse papillary  $\text{Ca}^{2+}$  transient, also reported by Wen et al. (22) (Fig. 8 A, blue trace). Next, model parameters were adjusted such that the simulated twitch response matched the measured twitch time course (Fig. 8 B, blue trace). This parameter set is shown in Table 1, set 3. Then, the  $\text{Ca}^{2+}$  input into the model was switched from the WT record to one measured in a mutant muscle (Fig. 8 A, red trace) and a new twitch tension was predicted. The mutant  $\text{Ca}^{2+}$  transient's slower decay did cause a slight prolongation of the simulated twitch relative to the WT case (Fig. 8 B, gray trace), but substantial differences remained relative to the measured R145G twitch. Ultimately, we found that besides the change in  $\text{Ca}^{2+}$  transient it was necessary to increase  $\lambda$  from its WT value of 0.06 up to a new value of 0.15 in order to achieve a close fit to the reported data (Fig. 8 B). This  $\lambda$ -change amounts to a prediction that the R145G mutation weakens IR-actin affinity, lowering binding energy by 2.3  $\text{kJ mol}^{-1}$  at 25°C (see Eq. 5). These results therefore suggest a specific mechanism

whereby this TnI mutation can exert substantial effects on the rate of twitch relaxation.

## DISCUSSION

Lehrer and Geeves (10) recently contemplated the impact of loose coupling on myofilament activity, primarily drawing on observations from in vitro solution studies of myofilament proteins. They found that the addition of a myosin-induced,  $\text{Ca}^{2+}$ -independent state increased  $\text{Ca}^{2+}$  sensitivity and  $\text{Ca}^{2+}$ -independent actin/myosin activity while lowering  $n_H$ . We have attempted to place their findings in a more physiological context by fitting our own model to data obtained from preparations with intact sarcomeres. This yielded evidence supporting the existence of meaningful CIA within functioning muscle, based on analysis of the xTnC data set of Gillis et al. (19). Similar to Lehrer and Geeves (10), we found that CIA modulated  $\text{Ca}^{2+}$  sensitivity,  $\text{Ca}^{2+}$ -independent force, and cooperativity of steady-state force (Fig. 6 A). Beyond steady-state type results, we were able to extend the model to study the effects of CIA on dynamic responses. Of particular interest were the findings that CIA has a strong impact on twitch relaxation and that such a mechanism can explain the measured effects of a TnI mutation on twitch contraction.

Our study suggests some practical bounds for the extent of generic CIA in cardiac muscle. We found that  $\lambda$ -values of 0.06 worked best when fitting parameters to data sets (Figs. 4 and 5). In terms of the model, this means that RU activation proceeds 17× more slowly in the absence of  $\text{Ca}^{2+}$ . When this is coupled with the inhibition imposed by inactive nearest neighbors (as would be the case on average for a muscle at rest), this value allows for loose coupling while still maintaining the requisite  $\text{Ca}^{2+}$  regulation of contraction. The thermodynamic constraint in our model that dissociation of  $\text{Ca}^{2+}$  from C or M state RUs also be slowed by the same factor  $\lambda$  actually reinforces the value of 0.06 as being reasonable: a 17× slower dissociation rate is of the same order as the 8× decrease in dissociation rate measured by Davis et al. (16) when regulated actin is treated with myosin S1 fragments. Hence, while we cannot



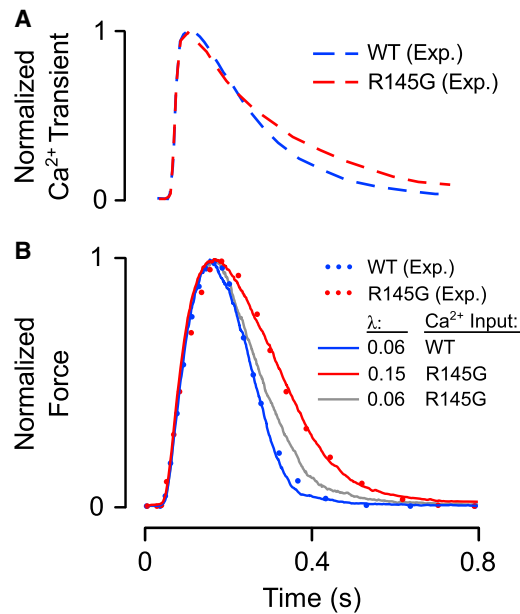

FIGURE 8 Analysis of the functional consequences of the TnI mutation R145G. (A) Ca<sup>2+</sup> transients were digitized from a study of papillary muscles taken from WT mice and R145G mutants by Wen et al. (22). (B) Simulated twitch responses (solid traces) were obtained by driving the model with Ca<sup>2+</sup> transients shown in (A). Model parameters were adjusted until output force (blue trace) matched a measured WT twitch record (blue dots). The fitted parameters are reported in Table 1, set 3. Then, driving the model with the R145G transient, the parameter  $\lambda$  was increased to determine whether this change was capable of explaining the effects of the mutation. Increasing  $\lambda$  from 0.06 to 0.15 allowed the model (red trace) to reproduce the measured R145G twitch record (red dots). To illustrate that the change in  $\lambda$  exerted substantial effects on twitch independent of the differences in WT and R145G Ca<sup>2+</sup> transients,  $\lambda$  was set to 0.06 once again and the model was driven with the R145G transient (gray trace). To see this figure in color, go online.

now estimate a value of  $\lambda$  with absolute certainty, the values used here seem plausible.

Far-reaching effects of the parameter  $\lambda$  in our model suggest that tuning CIA could be an important regulatory mechanism in the heart. The value  $\lambda$  had marked effects on twitch relaxation rate, with relatively minor effects on other aspects of contraction (Fig. 7). This raises the possibility that posttranslational modifications of TnI that impact either its inhibitory or switch regions (e.g., PKC phosphorylation of threonine 144) mediate lusitropic regulation with high specificity. Indeed, transgenic mice with pseudophosphorylated PKC sites on TnI exhibited slowed twitch relaxation (27). According to the model, these molecular perturbations would exert their effects through lowering  $\Delta G_{CIA}$ , possibly by weakening the binding affinity of the IR for the surface of actin. Similarly, we showed that lowering  $\Delta G_{CIA}$  (increasing  $\lambda$ ) prolonged relaxation in a manner that precisely resembled the effects of the TnI R145G mutation expressed in mice (22) (Fig. 8). The model therefore explains in quantitative and mechanistic terms how modifications to TnI's inhibitory region can act as potent regulators of cardiac relaxation.

Although the parameter  $\lambda$  can capture the effects of specific IR-actin perturbations such as the R145G mutation to TnI, it is necessary to emphasize that  $\lambda$  is a lumped term that likely represents not only IR-actin interactions, but also binding of the adjacent TnI switch region to TnC (Eq. 5). As such, it cannot be used to distinguish between IR-actin and switch region-TnC (SR-TnC) effects unless perturbations are targeted (as in the case of the R145G mutation). In other words, muscle behavior that is described by an increase in  $\lambda$  could indicate either a decrease in IR-actin affinity or an increase in SR-TnC affinity—both have the net effect of promoting dissociation of the IR from actin. Indeed,  $\lambda$  could conceivably represent any mechanism capable of encouraging the displacement of the IR from actin, such as spontaneous fluctuations in Tm position or forcible displacement of Tm by myosin.

One striking result yielded by the model was its ability to represent the divergent responses of cardiac and skeletal fibers to xTnC with a single change to the parameter  $\lambda$  (Fig. 4 B). This analysis suggests that the differing xTnC responses can be explained by well-known differences in troponin isoforms between the two muscle types (28,29). This is an alternate viewpoint to the interpretation offered in the original studies, namely that the distinct responses were indicative of fundamentally different sources of cooperativity (19,20). It was suggested that in skeletal muscle each Ca<sup>2+</sup> binding site regulates myosin binding sites beyond the seven that are structurally associated with a single RU. In this manner, a Ca<sup>2+</sup>-containing RU could activate neighboring stretches of the thin filament, even sites that should be inhibited by xTnC (20). It was further argued that the behavior of cardiac preparations could be explained if, in that muscle type, each Ca<sup>2+</sup>-containing RU activated less than seven myosin binding sites (19). They concluded that Tm is more flexible in cardiac muscle than in skeletal, and, by extension, that Tm-Tm interactions could not be the main source of cardiac muscle cooperativity. Our analysis does not require any assumption of differences in Tm flexibility, and as such supports the view that the mechanisms of cooperative Ca<sup>2+</sup> activation are similar in the two muscle types. This perspective may be more consistent with the broader collection of findings regarding Tm flexibility. Although some studies have suggested persistence lengths for Tm that are on the order of a single RU (30), several others have reported values corresponding to roughly 12 regulatory units (31,32), substantially more stiff than previously believed. Furthermore, rodent fast skeletal and cardiac muscle preparations like those used in the xTnC studies both express primarily  $\alpha$ -Tm (33), making differential Tm isoform expression an unlikely source of functional divergence.

Ultimately, further experiments will be required to resolve which mechanism accounts for skeletal and cardiac differences in the xTnC response. However, the model results reported here provide important insight in the form

of testable hypotheses. For instance, given that the model explains TnI R145G twitch results on the basis of decreased actin-IR affinity, we predict that repeating the xTnC experiments of Gillis et al. (19) in preparations containing the TnI R145G mutation will cause cardiac muscle to shift toward a more skeletal-type response (Fig. 4 B). Such experiments seem feasible and would directly test the model's validity.

It should be acknowledged that the model has resolution only at the level of single RUs, and does not consider fine regulation of the seven individual myosin binding sites within each (34,35). The ability of the model to reproduce key experimental phenomena despite this coarse-grained approach suggests that activation events are rarely limited to single RUs. Rather, they consist of several contiguous RUs that transition in concert, forming islands of activation (Fig. S3). Statistical analysis of raw MCMC model output shows that in the model activation occurs preferentially in islands, even at low pCa (Fig. S4). Elegant experiments by Desai et al. (36) have recently provided direct visualization of this type of clustered activation along the thin filament. To do so, they stretched single actin filaments between latex beads and tracked the binding of fluorescently labeled myosins. Binding events tended to cluster in contiguous regions along the filament, rather than occurring at random. The abundant structural evidence for strong Tm-Tm coupling (15,37) and the recent data of Desai et al. (36) leave little doubt that activation spreads through nearest neighbors along the thin filament. Several computational models of the thin filament, including our own, elevate the significance of Tm-Tm coupling by demonstrating that it can single-handedly account for a number of experimentally observed phenomena, including realistic Hill coefficients for steady-state activation, the  $\text{Ca}^{2+}$ -dependence of  $k_{tr}$ , and the effects of NEM-S1 on activation. In this article, we add to this list by successfully recapitulating the measured effects of xTnC on steady-state and dynamic aspects of thin filament activation.

At the same time, key questions regarding differences between skeletal and cardiac muscle remain unanswered. While we find the xTnC analysis convincing (Fig. 4 B), by their nature the xTnC experiments probably highlight differences in IR-actin binding between the two muscle types while eliminating the effects of any SR-TnC differences. The xTnC molecules used in those studies were engineered to disrupt  $\text{Ca}^{2+}$  binding to TnC, which in turn should block SR-TnC interactions for xTnC-containing RUs. In the absence of SR-TnC interactions, the two distinct  $\lambda$ -values fit to the data likely represent different IR-actin binding affinities. The implication is that the IR of cardiac TnI has a greater affinity for actin than that of skeletal TnI, a result which is intriguing given the fact that their amino-acid sequences in the inhibitory region differ by a single residue (28), with measurable consequences to function (38). A more comprehensive comparison of CIA between cardiac and skeletal muscle would use conditions that allow both

IR-actin and SR-TnC binding. SR-TnC affinity seems likely to differ between skeletal and cardiac muscles, considering stark differences in their respective TnI and TnC isoform sequences (28,29).

Aside from our model and that of Lehrer and Geeves (10), others have included CIA in varying forms. Some allow myosin to remain attached even after dissociation of  $\text{Ca}^{2+}$ , but do not allow  $\text{Ca}^{2+}$ -free crossbridge formation (39). Others include an explicit  $\text{Ca}^{2+}$ -independent activation pathway that resembles the one presented here (17,25,40,41). Dobrunz et al. (40) presented a four-state model that allows a force-generating permissive state without requiring the binding of  $\text{Ca}^{2+}$  to the troponin complex. Their four-state RU model is the rough equivalent of the one that would be obtained by taking our six-state representation (Fig. 1 C) and merging closed states with open states ( $C_0$  with  $M_0$  and  $C_1$  with  $M_1$ ). Rice et al. (17) also used a four-state model with a  $\text{Ca}^{2+}$ -free permissive state, while adding thermodynamic constraints very similar to those we have adopted. Although the main purpose of their study was to examine the impact of nearest-neighbor Tm interactions on cooperativity, they conducted some simulations under increasing amounts of CIA and noted the same impact on the  $F_{SS}$ -pCa relationship as we did (Fig. 6 A). The additional results presented here indicate that models with representations of CIA are more likely to exhibit realistic dynamic myofilament behavior and enable the analysis of targeted perturbations such as mutations to TnI.

While the model presented here is generally successful in reproducing experimental observations, it does have some systematic deviations from the data. Careful consideration of these discrepancies is instructive. We note, for instance, that the simulations underestimate tension produced under conditions of 25% functional TnC in cardiac muscle (Fig. 4 B, blue trace). We believe that this is a consequence of the model assuming a fixed RU span—when activation spreads along the thin filament in our model, one complete RU is the smallest increment available. As such, the model does not have adequate resolution to account for recruitment of neighboring myosin binding sites within single RUs along the thin filament. This is particularly critical in transition zones, or points along the filament where inactive RUs are found adjacent to active ones (see Fig. S3). At higher fractions of functional TnC, this assumption is reasonable because long contiguous stretches of the filament can still be activated together, and there are few transition zones. In contrast, there will be many more transition zones at 25% functional TnC, and the model, lacking intra-RU resolution, loses some accuracy. This may also explain why  $k_{tr}$  values for 50% functional TnC are overestimated by the model (Fig. 5 B, orange trace). Therefore, refining the spatial resolution of the model to include individual myosin binding sites (25,34,35) is an important future direction for this work, insofar as it may reconcile remaining discrepancies with the measured data.

## SUPPORTING MATERIAL

Four figures are available at [http://www.biophysj.org/biophysj/supplemental/S0006-3495\(15\)00999-6](http://www.biophysj.org/biophysj/supplemental/S0006-3495(15)00999-6).

## AUTHOR CONTRIBUTIONS

Y.A., J.A.B., K.J.M., and S.G.C. designed and implemented the computational model; Y.A., J.A.B., and K.J.M. performed simulations; and Y.A., J.A.B., and S.G.C. wrote the article.

## ACKNOWLEDGMENTS

The authors acknowledge Sander Land for helpful discussions and comments on an early draft of the article.

This work was supported in part by the facilities and staff of the Yale University Faculty of Arts and Sciences High Performance Computing Center. It was also supported in part by National Institutes of Health award No. 1R21HL126025 to S.G.C. and Clinical and Translational Science Award No. UL1 TR000142 from the National Center for Advancing Translational Science, a component of the National Institutes of Health.

Its contents are solely the responsibility of the authors and do not necessarily represent the official view of the National Institutes of Health.

## REFERENCES

- Gordon, A. M., E. Homsher, and M. Regnier. 2000. Regulation of contraction in striated muscle. *Physiol. Rev.* 80:853–924.
- Fuchs, F. 1975. Thermal inactivation of the calcium regulatory mechanism of human skeletal muscle actomyosin: a possible contributing factor in the rigidity of malignant hyperthermia. *Anesthesiology.* 42:584–589.
- McKillop, D. F., and M. A. Geeves. 1993. Regulation of the interaction between actin and myosin subfragment 1: evidence for three states of the thin filament. *Biophys. J.* 65:693–701.
- Schaertl, S., S. S. Lehrer, and M. A. Geeves. 1995. Separation and characterization of the two functional regions of troponin involved in muscle thin filament regulation. *Biochemistry.* 34:15890–15894.
- Maytum, R., B. Westerdorf, ..., M. A. Geeves. 2003. Differential regulation of the actomyosin interaction by skeletal and cardiac troponin isoforms. *J. Biol. Chem.* 278:6696–6701.
- Ranatunga, K. W. 1994. Thermal stress and Ca-independent contractile activation in mammalian skeletal muscle fibers at high temperatures. *Biophys. J.* 66:1531–1541.
- Campbell, K. S., J. R. Patel, and R. L. Moss. 2003. Cycling cross-bridges increase myocardial stiffness at submaximal levels of Ca<sup>2+</sup> activation. *Biophys. J.* 84:3807–3815.
- Wu, Y., O. Cazorla, ..., H. Granzier. 2000. Changes in titin and collagen underlie diastolic stiffness diversity of cardiac muscle. *J. Mol. Cell. Cardiol.* 32:2151–2161.
- Kass, D. A., J. G. F. Bronzwaer, and W. J. Paulus. 2004. What mechanisms underlie diastolic dysfunction in heart failure? *Circ. Res.* 94:1533–1542.
- Lehrer, S. S., and M. A. Geeves. 2014. The myosin-activated thin filament regulatory state, M<sup>-</sup>-open: a link to hypertrophic cardiomyopathy (HCM). *J. Muscle Res. Cell Motil.* 35:153–160.
- Campbell, S. G., F. V. Lionetti, ..., A. D. McCulloch. 2010. Coupling of adjacent tropomyosins enhances cross-bridge-mediated cooperative activation in a Markov model of the cardiac thin filament. *Biophys. J.* 98:2254–2264.
- Robinson, J. M., Y. Wang, ..., H. C. Cheung. 2002. Activation of striated muscle: nearest-neighbor regulatory-unit and cross-bridge influence on myofilament kinetics. *J. Mol. Biol.* 322:1065–1088.
- Smith, D. A., and M. A. Geeves. 2003. Cooperative regulation of myosin-actin interactions by a continuous flexible chain II: actin-tropomyosin-troponin and regulation by calcium. *Biophys. J.* 84:3168–3180.
- Kobayashi, T., and R. J. Solaro. 2005. Calcium, thin filaments, and the integrative biology of cardiac contractility. *Annu. Rev. Physiol.* 67:39–67.
- Vibert, P., R. Craig, and W. Lehman. 1997. Steric-model for activation of muscle thin filaments. *J. Mol. Biol.* 266:8–14.
- Davis, J. P., C. Norman, ..., S. B. Tikunova. 2007. Effects of thin and thick filament proteins on calcium binding and exchange with cardiac troponin C. *Biophys. J.* 92:3195–3206.
- Rice, J. J., G. Stolovitzky, ..., P. P. de Tombe. 2003. Ising model of cardiac thin filament activation with nearest-neighbor cooperative interactions. *Biophys. J.* 84:897–909.
- Campbell, K. S., and A. M. Holbrook. 2007. The rate of tension recovery in cardiac muscle correlates with the relative residual tension prevailing after restretch. *Am. J. Physiol. Heart Circ. Physiol.* 292:H2020–H2022.
- Gillis, T. E., D. A. Martyn, ..., M. Regnier. 2007. Investigation of thin filament near-neighbour regulatory unit interactions during force development in skinned cardiac and skeletal muscle. *J. Physiol.* 580:561–576.
- Regnier, M., A. J. Rivera, ..., A. M. Gordon. 2002. Thin filament near-neighbour regulatory unit interactions affect rabbit skeletal muscle steady-state force-Ca<sup>2+</sup> relations. *J. Physiol.* 540:485–497.
- Janssen, P. M., and P. P. de Tombe. 1997. Uncontrolled sarcomere shortening increases intracellular Ca<sup>2+</sup> transient in rat cardiac trabeculae. *Am. J. Physiol.* 272:H1892–H1897.
- Wen, Y., J. R. Pinto, ..., W. G. L. Kerrick. 2008. Functional consequences of the human cardiac troponin I hypertrophic cardiomyopathy mutation R145G in transgenic mice. *J. Biol. Chem.* 283:20484–20494.
- Kennedy, J., R. C. Eberhart, and Y. Shi. 2001. Swarm Intelligence. Morgan Kaufmann, San Francisco, CA.
- Gao, W. D., P. H. Backx, ..., E. Marban. 1994. Myofilament Ca<sup>2+</sup> sensitivity in intact versus skinned rat ventricular muscle. *Circ. Res.* 74:408–415.
- Tanner, B. C. W., T. L. Daniel, and M. Regnier. 2012. Filament compliance influences cooperative activation of thin filaments and the dynamics of force production in skeletal muscle. *PLoS Comput. Biol.* 8:e1002506.
- Campbell, K. 1997. Rate constant of muscle force redevelopment reflects cooperative activation as well as cross-bridge kinetics. *Biophys. J.* 72:254–262.
- Kirk, J. A., G. A. MacGowan, ..., S. G. Shroff. 2009. Left ventricular and myocardial function in mice expressing constitutively pseudophosphorylated cardiac troponin I. *Circ. Res.* 105:1232–1239.
- Wilkinson, J. M., and R. J. Grand. 1978. Comparison of amino acid sequence of troponin I from different striated muscles. *Nature.* 271:31–35.
- van Eerd, J. P., and K. Takahashi. 1975. The amino acid sequence of bovine cardiac troponin-C. Comparison with rabbit skeletal troponin-C. *Biochem. Biophys. Res. Commun.* 64:122–127.
- Loong, C. K. P., H.-X. Zhou, and P. B. Chase. 2012. Persistence length of human cardiac  $\alpha$ -tropomyosin measured by single molecule direct probe microscopy. *PLoS One.* 7:e39676.
- Li, X. E., W. Lehman, and S. Fischer. 2010. The relationship between curvature, flexibility and persistence length in the tropomyosin coiled-coil. *J. Struct. Biol.* 170:313–318.
- Li, X. E., M. Orzechowski, ..., S. Fischer. 2014. Structure and flexibility of the tropomyosin overlap junction. *Biochem. Biophys. Res. Commun.* 446:304–308.
- Cummins, P., and S. V. Perry. 1974. Chemical and immunochemical characteristics of tropomyosins from striated and smooth muscle. *Biochem. J.* 141:43–49.

34. Zou, G., and G. N. Phillips, Jr. 1994. A cellular automaton model for the regulatory behavior of muscle thin filaments. *Biophys. J.* 67:11–28.
35. Tanner, B. C., T. L. Daniel, and M. Regnier. 2007. Sarcomere lattice geometry influences cooperative myosin binding in muscle. *PLoS Comput. sBiol.* 3:e115.
36. Desai, R., M. A. Geeves, and N. M. Kad. 2015. Using fluorescent myosin to directly visualize cooperative activation of thin filaments. *J. Biol. Chem.* 290:1915–1925.
37. Murakami, K., M. Stewart, ..., T. Wakabayashi. 2008. Structural basis for tropomyosin overlap in thin (actin) filaments and the generation of a molecular swivel by troponin-T. *Proc. Natl. Acad. Sci. USA.* 105:7200–7205.
38. Tachampa, K., H. Wang, ..., P. P. de Tombe. 2007. Cardiac troponin I threonine 144: role in myofilament length dependent activation. *Circ. Res.* 101:1081–1083.
39. Landesberg, A., and S. Sideman. 1994. Mechanical regulation of cardiac muscle by coupling calcium kinetics with cross-bridge cycling: a dynamic model. *Am. J. Physiol.* 267:H779–H795.
40. Dobrunz, L. E., P. H. Backx, and D. T. Yue. 1995. Steady-state  $[Ca^{2+}]_i$ -force relationship in intact twitching cardiac muscle: direct evidence for modulation by isoproterenol and EMD 53998. *Biophys. J.* 69:189–201.
41. Rice, J. J., F. Wang, ..., P. P. de Tombe. 2008. Approximate model of cooperative activation and crossbridge cycling in cardiac muscle using ordinary differential equations. *Biophys. J.* 95:2368–2390.



**Biophysical Journal**

**Supporting Material**

**Contributions of Ca<sup>2+</sup>-Independent Thin Filament Activation to Cardiac Muscle Function**

Yasser Aboelkassem,<sup>1</sup> Jordan A. Bonilla,<sup>2</sup> Kimberly J. McCabe,<sup>1</sup> and Stuart G. Campbell<sup>1,\*</sup>

<sup>1</sup>Department of Biomedical Engineering, Yale University, New Haven, Connecticut; and <sup>2</sup>Department of Computing and Mathematical Sciences, California Institute of Technology, Pasadena, California

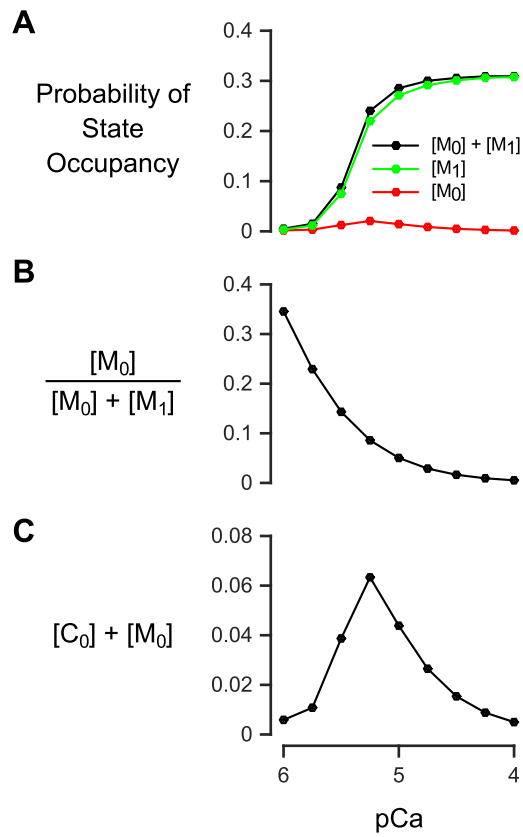

Supplemental Figure 1: Occupancy of the Ca<sup>2+</sup>-independent states as a function of pCa, using Parameter Set 1, Table 1. (A) The probability of occupancy for the force-generating states M<sub>0</sub> and M<sub>1</sub> (and their sum). (B) The fraction of force arising from CIA (Ca<sup>2+</sup>-independent activation), obtained by dividing the probability of the M<sub>0</sub> state by the total M-state probability ([M<sub>0</sub>] + [M<sub>1</sub>]). (C) The total probability of Ca<sup>2+</sup>-free states (given by [C<sub>0</sub>] + [M<sub>0</sub>]).

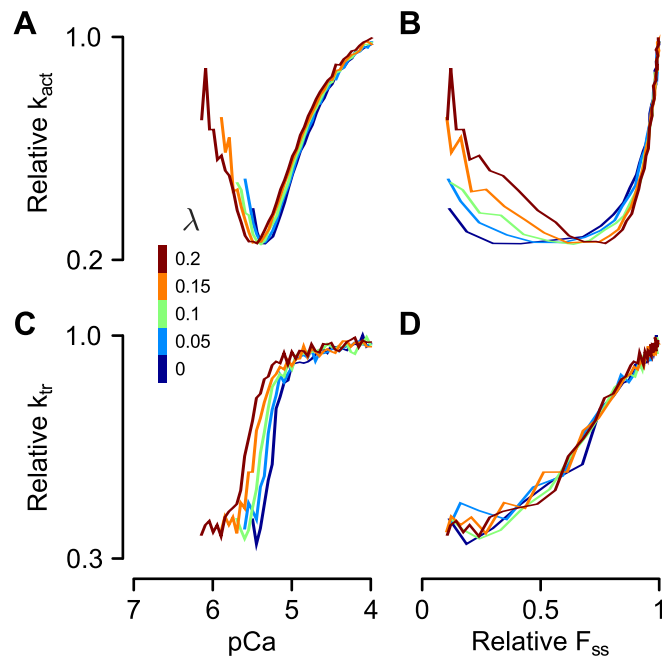

Supplemental Figure 2: The impact of  $\text{Ca}^{2+}$  and  $\lambda$  on rates of force development. Steady-state forces ( $F_{SS}$ ) corresponding to each of the reported rate values are shown in Fig. 6A of the main manuscript. (A) The rate of force development following  $\text{Ca}^{2+}$  activation ( $k_{act}$ ) is plotted as a function of pCa for  $\lambda$  values ranging from 0 to 0.2, as indicated by the color scale. (B)  $k_{act}$  values plotted as a function of steady-state force ( $F_{SS}$ ).  $\lambda$  exerted complex effects on the  $k_{act}$ - $F_{SS}$  relationship, speeding  $k_{act}$  at low forces but slowing it at force levels greater than 70% of maximum. (C) The rate of force re-development following slack/restretch ( $k_{tr}$ ) as a function of both pCa and  $\lambda$ . (D) The same data plotted against  $F_{SS}$ . The exponential increase in  $k_{act}$  as it approaches maximum force (panel B) is reminiscent of measurements made in isolated cardiac myofibrils (41). A linear relationship between  $k_{tr}$  and  $F_{SS}$  (panel D) has been widely observed in skinned myocardial preparations (42, 43).

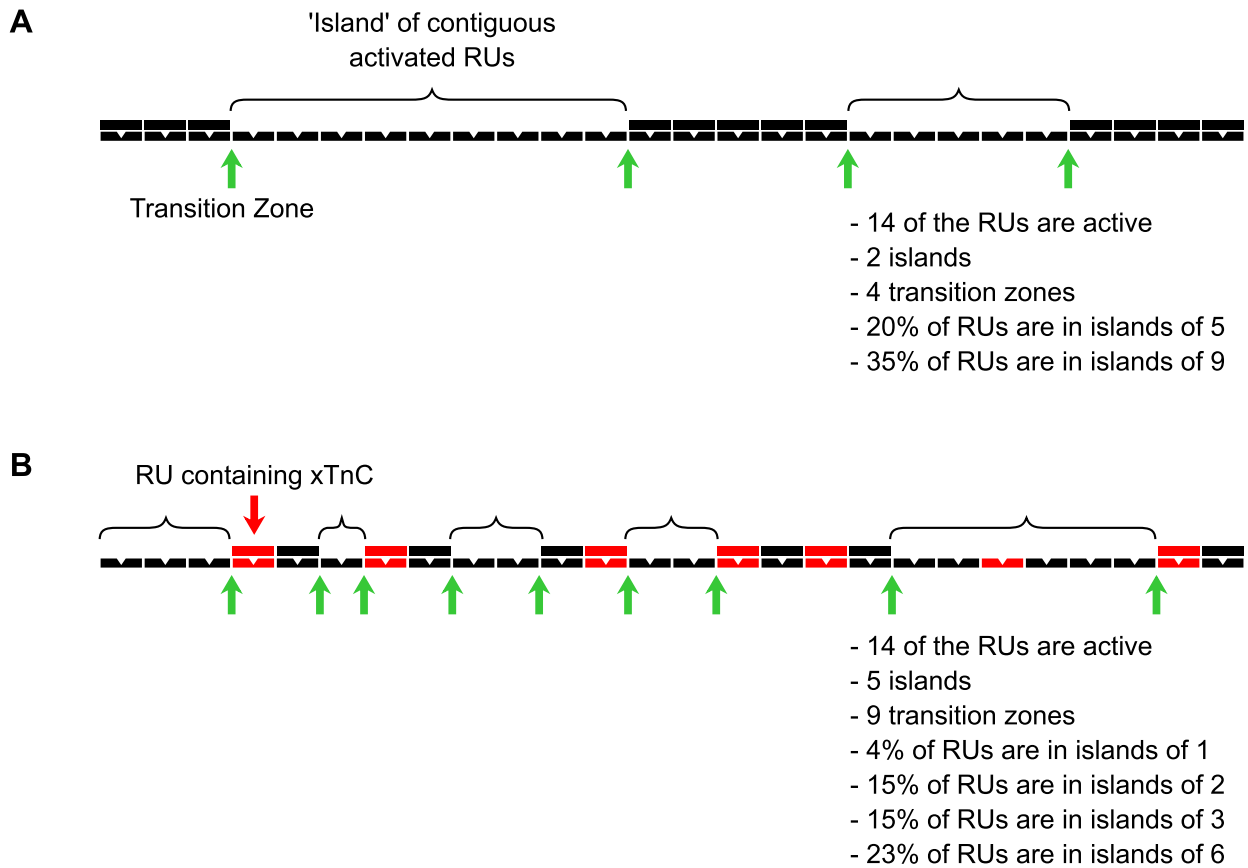

Supplemental Figure 3: Thin filament configurations and their characterization. The MCMC simulations performed in this study enabled characterization of patterns of thin filament activation under varying conditions. For instance, active RUs (C or M states) were frequently clustered together into 'islands' (panel A). By sampling many thin filament configurations from simulation data, it is possible to determine the statistical occurrence of islands of given sizes. This schematic also illustrates 'transition zones', which occur on either side of an island. At these points, adjacent RUs occupy dissimilar states (active vs. inactive). Under conditions of high  $\text{Ca}^{2+}$  and no xTnC (panel A), there are relatively few transition zones. When large numbers of RUs contain xTnC, activation islands become fragmented, and the number of transition zones drastically increases (panel B). Under conditions of high xTnC content, a model with fixed RU span, such as the one we employ here, tends to underestimate the steady-state force.



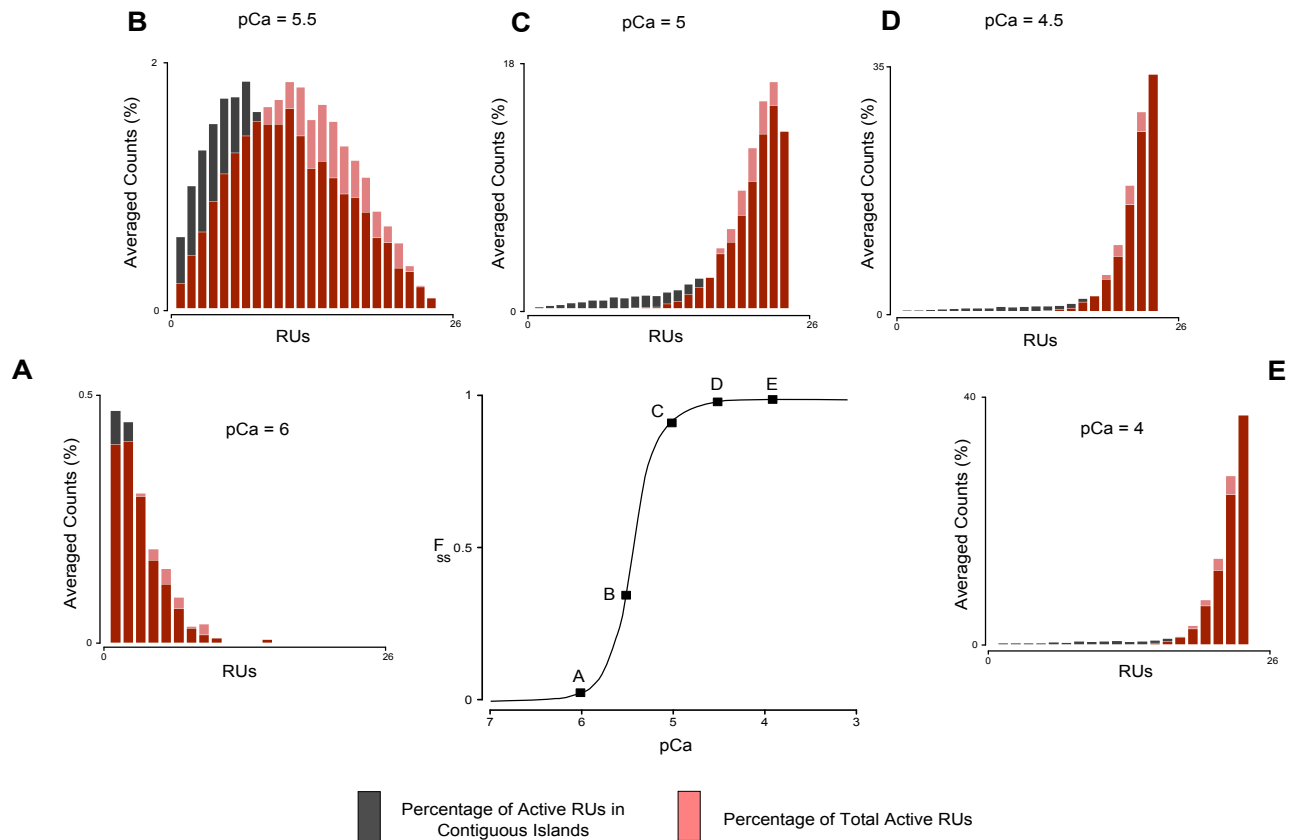

Supplemental Figure 4: Analysis of thin filament configurations predicted by the model. Many hundreds of thin filament configurations (see Supplemental Figure 3) were generated by the model at a range of pCa values, and were analyzed to determine the distribution of activation within filaments and across filaments. The inset in the center shows an  $F_{SS}$ -pCa curve produced by the model, with points labeled A-E). At each of these points, a histogram is shown that describes the sampled population of thin filament configurations. Red bars indicate the percentage of whole filaments having the total number of active RUs indicated by the bin on the x-axis. For instance, in panel A, the left-most red bar (the bin for 1RU) shows a value of  $\sim 0.4\%$ . This means that 0.4% of thin filaments sampled contained exactly 1 active RU. Black bars indicate how the active RUs are distributed within thin filaments. For example, the left-most black bar in panel A shows a value of  $\sim 0.45\%$ . This means that 0.45% of all RUs were found to be in islands 1 RU in length. Similarly, that same panel shows that detectable numbers of RUs were found in islands of length greater than 1 RU. We can see from this histogram that even at pCa 6, when activation is minimal, more RUs reside in contiguous islands (islands greater than 1 RU) than are activated in isolation (islands of 1). In panels B-E, it is clear that increasing  $\text{Ca}^{2+}$  concentration promotes the formation of larger and larger islands of active RUs.
